# Supplementary material
Source: PubMed Central journal article supplement (PMC6397669)

## **SUPPLEMENTAL METHODS**

### **Immunophenotyping of Lymphocytes and Blasts from BM Aspirates and Peripheral Blood**

PBMCs or BMAs from patients were collected in Vacutainer or Cell Preparation Tubes (CPT) containing sodium heparin (BD Vacutainer, Franklin Lakes, NJ). Mononuclear cells (MC) were isolated from PB or BMA by centrifuging the cell preparation tubes (CPT) at 2000rpm (863g) for 15 minutes at room temperature. Samples were diluted sample 1:5 with Phosphate Buffered Saline (PBS) and layered over 10ml of Ficoll. The mixture was centrifuged at 2000rpm (863g) for 20 minutes at room temperature with no brakes. The interface cells were harvested and washed twice with PBS containing 10% fetal calf serum at 500g and 450g for 10 minutes respectively. MCs were then re-suspended in PBS and used for further analysis. 17-color multi-parameter flow-cytometry was performed on BMA cells using fluorescence-conjugated monoclonal antibodies or mass cytometry (CyTOF) using metal tagged antibodies either purchased pre-conjugated from Fluidigm or purchased purified and conjugated in house using MaxPar X8 Polymer kits (Fluidigm) according to the manufacturer's instructions. Cells for flow cytometry were acquired using Fortessa (BD Biosciences, Heidelberg, Germany) and analysis was performed using FlowJo software (Tree Star, Ashland, OR, USA) and samples for CyTOF were acquired on a Helios mass cytometer (Fluidigm) and analyzed by viSNE using Matlab.

### **Immunohistochemistry Processing and Staining of BM clots and slides**

BM clots and biopsies were fixed in 10% formalin, embedded in paraffin, and transversely sliced into 4  $\mu$ m sections. Slides were stained with mouse anti-human monoclonal antibodies against CD3 (Dako, Cat#A0452, 1:100) and CD8 (Thermo Scientific, MS-457-S, 1:25). For IHC quantification, H&E and IHC slides were scanned and digitalized using the ScanscopeXT system from Aperio/Leica Technologies.

### **Mutational Analysis by Next Generation Sequencing**

We performed mutation analysis using a 28-gene panel as previously described [4]. Briefly,

genomic DNA was extracted from BM aspirates or peripheral blood. Amplicon-based next-generation sequencing (NGS) targeting the entire coding regions of a panel of 28 genes associated with myeloid neoplasms was performed using a MiSeq platform (Illumina, San Diego, CA). The genes analyzed included are noted in Supplemental Table 3. A sequencing library was prepared using 250 ng of DNA template. Equal quantities of DNA from purified sequencing libraries were used for TruSeq paired-end sequencing on the MiSeq sequencer using the MiSeq Reagent Kit v2 (500 cycles). Variant calling was performed with Illumina MiSeq Reporter Software using human genome build 19 (hg 19) as a reference. For clinical reporting, a minimum sequencing coverage of 3250 (bidirectional true paired-end sequencing) was required. The analytical sensitivity was established at 5% mutant reads in a background of wild-type reads. CEBPA was performed using PCR followed by Sanger sequencing. Internal tandem duplications of FLT3 gene and NPM1 mutation (exon12) were assessed using PCR followed by capillary electrophoresis (all of these methods have been previously described).

**Supplemental Table 1: Multivariate analysis for significant univariate factors for response to therapy**

| (N=40; ORR = 19)                | Odds Ratio | 95%CI for OR | p           |
|---------------------------------|------------|--------------|-------------|
| <b>Prior HMA</b>                |            |              |             |
| Yes                             |            |              |             |
| No                              | 0.22       | 0.05         | 1.06 0.059  |
| <b>ASXL1</b>                    |            |              |             |
| Negative                        |            |              |             |
| Positive                        | 6.37       | 0.97         | 41.69 0.053 |
| <b>BM BL<math>\geq</math>20</b> |            |              |             |
| No                              |            |              |             |
| Yes                             | 1.25       | 0.24         | 6.42 0.788  |
| <b>WBC<math>&gt;</math>10</b>   |            |              |             |
| No                              |            |              |             |
| Yes                             | 1.00       |              |             |
| <b>Pretherapy BM CD3</b>        | 1.03       | 1.00         | 1.07 0.065  |

**Supplemental Table 2: Median overall survival by pretherapy characteristics**

|                         | Survival (months) | p-value                 |
|-------------------------|-------------------|-------------------------|
| Response                |                   | <b><u>&lt;0.001</u></b> |
| CR, CRi, PR, HI         | 15.9              |                         |
| SD                      | 16.2              |                         |
| NR                      | 4.1               |                         |
| Age                     |                   | 0.78                    |
| <60                     | 5.95              |                         |
| >/=60                   | 6.60              |                         |
| Age                     |                   | 0.95                    |
| <70                     | 5.98              |                         |
| >/=70                   | 6.60              |                         |
| Salvage status          |                   | <b><u>0.003</u></b>     |
| S1                      | 10.55             |                         |
| >S1                     | 5.68              |                         |
| Salvage status          |                   | 0.39                    |
| S1/S2                   | 5.68              |                         |
| >S2                     | 6.27              |                         |
| Diagnosis               |                   | 0.46                    |
| AML - de novo           | 7.59              |                         |
| Secondary AML           | 5.98              |                         |
| Prior ASCT              |                   | 0.55                    |
| Yes                     | 6.8               |                         |
| No                      | 6.4               |                         |
| Prior HMA               |                   | 0.35                    |
| Yes                     | 6.30              |                         |
| No                      | 8.18              |                         |
| Cytogenetic             |                   | 0.06                    |
| Diploid                 | 11.2              |                         |
| Miscellaneous           | 3.8               |                         |
| -5/-7/complex           | 6.8               |                         |
| TP53                    |                   | 0.65                    |
| Negative                | 6.60              |                         |
| Positive                | 5.98              |                         |
| IDH1                    |                   | 0.44                    |
| Negative                | 6.6               |                         |
| Positive                | 5.94              |                         |
| IDH2                    |                   | 0.16                    |
| Negative                | 5.97              |                         |
| Positive                | 12.6              |                         |
| RAS                     |                   | 0.83                    |
| Negative                | 6.40              |                         |
| Positive                | 9.60              |                         |
| ASXL1                   |                   | <b><u>0.04</u></b>      |
| Negative                | 5.7               |                         |
| Positive                | 15.2              |                         |
| BM BL>/=20              |                   | 0.29                    |
| No                      | 9.6               |                         |
| Yes                     | 5.9               |                         |
| BM BL>/=10              |                   | 0.27                    |
| No                      | 11.2              |                         |
| Yes                     | 6.4               |                         |
| WBC>10                  |                   | 0.08                    |
| No                      | 7.58              |                         |
| Yes                     | 3.48              |                         |
| PLT>50                  |                   | 0.36                    |
| No                      | 5.58              |                         |
| Yes                     | 7.58              |                         |
| Pretherapy PB CD3 >20.5 |                   | 0.10                    |
| No                      | 5.29              |                         |
| Yes                     | 11.89             |                         |
| Pretherapy BM CD3 >13.2 |                   | 0.09                    |
| No                      | 5.68              |                         |
| Yes                     | 12.45             |                         |

**Supplemental Table 3: Historical HMA-based clinical trials at MDACC between 2005-2017.**

**1- HMA + Targeted or chemo based therapy (NCT03404193, NCT03132454, NCT02400281, NCT02257138, NCT03047993, NCT00741234, NCT02096055, NCT02141477, NCT00741234, NCT02003573, NCT00357708, NCT02190695, NCT01828346, NCT01926587, NCT01636609, NCT01202877, and NCT00569010).**

**2- HMA + Immunotherapy (NCT02953561, NCT02399917, NCT00968071, NCT01038635).**

**3- Single agent HMA (NCT02096055).**

| <b>Protocol #</b> | <b>Regimen</b>           |             |
|-------------------|--------------------------|-------------|
| <b>2016-0772</b>  | Palbociclib+Decitabine   | NCT03132454 |
| <b>2014-0862</b>  | Azacitidine+Lirilumab    | NCT02399917 |
| <b>2014-0344</b>  | Ruxolitinib+Decitabine   | NCT02257138 |
| <b>2014-0152</b>  | Azacitidine+CB-839       | NCT03047993 |
| <b>2013-0873</b>  | Azacitidine+Pracinostat  | NCT00741234 |
| <b>2013-0843</b>  | SGI-110 5+Cladribine     | NCT02096055 |
| <b>2013-0843</b>  | SGI-110 10               | NCT02096055 |
| <b>2013-0812</b>  | Decitabine+Omacetaxine   | NCT02141477 |
| <b>2013-0596</b>  | Azacitidine+Pracinostat  | NCT00741234 |
| <b>2013-0583</b>  | Decitabine+Volasertib    | NCT02003573 |
| <b>2005-0723</b>  | SAHA+Decitabine          | NCT00357708 |
|                   | Decitabine+Carboplatin   |             |
| <b>2013-0543</b>  | Decitabine               | NCT02190695 |
|                   | Decitabine+ Arsenic      |             |
| <b>2013-0141</b>  | Azacitidine+Birinapant   | NCT01828346 |
| <b>2013-0030</b>  | Azacitidine+Rigosertib   | NCT01926587 |
| <b>2011-0188</b>  | Tosedostat+Aza           | NCT01636609 |
| <b>2010-0374</b>  | Azacitidine+PKC412       | NCT01202877 |
| <b>2009-0467</b>  | Azacitidine+Lenalidomide | NCT01038635 |
| <b>2008-0288</b>  | Decitabine+Mylotarg      | NCT00968071 |
| <b>2005-0291</b>  | Azacitidine+Ara-C        | NCT00569010 |

### Supplemental Table 4

| Supplemental Table 4A. T-tests comparison by ORR and OS>1 year |    |       |       |     |       |       |              |
|----------------------------------------------------------------|----|-------|-------|-----|-------|-------|--------------|
|                                                                | No |       |       | Yes |       |       |              |
|                                                                | N  | Mean  | SD    | N   | Mean  | SD    | p-value      |
| <b>ORR</b>                                                     |    |       |       |     |       |       |              |
| cd3 onlive                                                     | 23 | 17.56 | 19.77 | 19  | 32.47 | 26.20 | <b>0.042</b> |
| Treg onlive                                                    | 23 | 0.83  | 0.89  | 19  | 1.13  | 1.29  | 0.377        |
| Teff onlive                                                    | 23 | 8.97  | 11.20 | 19  | 15.61 | 12.71 | <b>0.080</b> |
| cd8 onlive                                                     | 23 | 6.93  | 8.69  | 19  | 13.12 | 14.43 | 0.094        |
| cd8_treg                                                       | 23 | 15.53 | 18.23 | 18  | 24.94 | 43.03 | 0.349        |
| teff_treg                                                      | 23 | 15.53 | 18.23 | 18  | 24.94 | 43.03 | 0.349        |
| cd8 icos                                                       | 23 | 15.04 | 10.30 | 19  | 11.21 | 11.14 | 0.255        |
| Teff icos                                                      | 23 | 19.20 | 22.13 | 19  | 7.18  | 7.68  | <b>0.030</b> |
| cd8 pd1                                                        | 23 | 36.98 | 18.74 | 19  | 33.71 | 14.80 | 0.540        |
| Teff pd1                                                       | 23 | 39.22 | 25.12 | 19  | 33.71 | 23.07 | 0.467        |
| cd8 ctla4                                                      | 23 | 12.74 | 18.35 | 19  | 6.48  | 7.39  | 0.171        |
| Teff ctla4                                                     | 23 | 10.48 | 10.60 | 19  | 9.23  | 10.54 | 0.707        |
| <b>OS&gt;1 year</b>                                            |    |       |       |     |       |       |              |
| cd3onlive                                                      | 30 | 21.43 | 21.94 | 17  | 31.49 | 25.81 | 0.164        |
| tregonlive                                                     | 30 | 0.92  | 1.02  | 17  | 1.19  | 1.23  | 0.424        |
| teffonlive                                                     | 30 | 11.00 | 12.45 | 17  | 14.89 | 12.02 | 0.304        |
| cd8onlive                                                      | 30 | 8.12  | 9.88  | 17  | 13.08 | 13.92 | 0.161        |
| cd8_treg                                                       | 30 | 16.13 | 18.69 | 16  | 25.32 | 45.52 | 0.337        |
| teff_treg                                                      | 30 | 16.13 | 18.69 | 16  | 25.32 | 45.52 | 0.337        |
| cd8icos                                                        | 30 | 13.46 | 10.09 | 17  | 12.49 | 11.23 | 0.763        |
| tefficos                                                       | 30 | 14.96 | 15.35 | 17  | 9.86  | 20.26 | 0.336        |
| cd8pd1                                                         | 30 | 37.46 | 19.11 | 17  | 31.53 | 15.54 | 0.281        |
| teffpd1                                                        | 30 | 38.25 | 25.78 | 17  | 33.54 | 19.88 | 0.519        |
| cd8ctla4                                                       | 30 | 9.31  | 15.18 | 17  | 8.63  | 12.26 | 0.876        |
| teffctla4                                                      | 30 | 10.19 | 10.98 | 17  | 8.18  | 8.53  | 0.519        |

| <b>Supplemental Table 4B Empirical estimation of cut-points by Yeomans index (Bone marrow)</b> |           |             |             |      |              |
|------------------------------------------------------------------------------------------------|-----------|-------------|-------------|------|--------------|
| Baseline measurements                                                                          | Cut-point | Sensitivity | Specificity | AUC  | p-value      |
| <b>ORR</b>                                                                                     |           |             |             |      |              |
| cd3onlive                                                                                      | 13.20     | 0.74        | 0.65        | 0.69 | <b>0.029</b> |
| tregonlive                                                                                     | 2.18      | 0.26        | 0.91        | 0.59 | 0.284        |
| teffonlive                                                                                     | 11.60     | 0.58        | 0.78        | 0.68 | <b>0.041</b> |
| cd8onlive                                                                                      | 4.01      | 0.74        | 0.61        | 0.67 | <b>0.054</b> |
| tregctla4                                                                                      | 26.90     | 0.58        | 0.48        | 0.53 | 0.929        |
| tregicos                                                                                       | 1.91      | 0.95        | 0.09        | 0.52 | 0.890        |
| tregpd1                                                                                        | 62.50     | 0.16        | 0.96        | 0.56 | 0.486        |
| teffctla4                                                                                      | 39.10     | 0.05        | 1.00        | 0.53 | 0.890        |
| tefficos                                                                                       | 1.22      | 0.84        | 0.26        | 0.55 | 0.626        |
| teffpd1                                                                                        | 62.60     | 0.21        | 0.87        | 0.54 | 0.764        |
| cd8ctla4                                                                                       | 2.62      | 0.68        | 0.39        | 0.54 | 0.827        |
| cd8icos                                                                                        | 30.10     | 0.16        | 0.91        | 0.54 | 0.800        |
| cd8pd1                                                                                         | 17.80     | 0.79        | 0.30        | 0.55 | 0.703        |
| cd8_treg                                                                                       | 1.79      | 0.94        | 0.22        | 0.58 | 0.176        |
| teff_treg                                                                                      | 1.79      | 0.94        | 0.22        | 0.58 | 0.176        |
| <b>OS&gt;1year</b>                                                                             |           |             |             |      |              |
| cd3onlive                                                                                      | 9.12      | 0.82        | 0.47        | 0.65 | 0.084        |
| tregonlive                                                                                     | 1.85      | 0.35        | 0.83        | 0.59 | 0.253        |
| teffonlive                                                                                     | 5.12      | 0.82        | 0.50        | 0.66 | 0.055        |
| cd8onlive                                                                                      | 3.31      | 0.82        | 0.53        | 0.68 | 0.036        |
| tregctla4                                                                                      | 12.80     | 0.94        | 0.13        | 0.54 | 0.631        |
| tregicos                                                                                       | 1.91      | 0.94        | 0.07        | 0.50 | 0.681        |
| tregpd1                                                                                        | 17.80     | 0.76        | 0.33        | 0.55 | 0.634        |
| teffctla4                                                                                      | 1.73      | 0.82        | 0.27        | 0.55 | 0.648        |
| tefficos                                                                                       | 55.00     | 0.06        | 1.00        | 0.53 | 0.681        |
| teffpd1                                                                                        | 20.80     | 0.76        | 0.40        | 0.58 | 0.357        |
| cd8ctla4                                                                                       | 7.48      | 0.41        | 0.77        | 0.59 | 0.308        |
| cd8icos                                                                                        | 21.30     | 0.29        | 0.80        | 0.55 | 0.647        |
| cd8pd1                                                                                         | 17.80     | 0.76        | 0.30        | 0.53 | 0.813        |

| <b>Supplemental Table 4C. Empirical estimation of cut-points by Yeomans index (peripheral blood)</b> |          |             |             |      |         |       |         |
|------------------------------------------------------------------------------------------------------|----------|-------------|-------------|------|---------|-------|---------|
|                                                                                                      | Cutpoint | Sensitivity | Specificity | AUC  | p-value |       |         |
| ORR                                                                                                  |          |             |             |      |         |       |         |
| CD3                                                                                                  | 20.50    | 0.72        | 0.68        | 0.70 | 0.028   |       |         |
| CR/CRi/PR                                                                                            |          |             |             |      |         |       |         |
| CD3                                                                                                  | 57.60    | 0.46        | 0.93        | 0.69 | 0.020   |       |         |
| OS>1year                                                                                             |          |             |             |      |         |       |         |
| CD3                                                                                                  | 33.30    | 0.71        | 0.69        | 0.70 | 0.031   |       |         |
|                                                                                                      |          |             |             |      |         |       |         |
| <b>T-tests comparison by ORR and OS&gt;1 year</b>                                                    |          |             |             |      |         |       |         |
|                                                                                                      | No       |             |             | Yes  |         |       |         |
|                                                                                                      | N        | Mean        | SD          | N    | Mean    | SD    | p-value |
| ORR                                                                                                  |          |             |             |      |         |       |         |
| CD3                                                                                                  | 22       | 21.83       | 21.70       | 18   | 45.07   | 26.99 | 0.004   |
| OS>1year                                                                                             |          |             |             |      |         |       |         |
| CD3                                                                                                  | 26       | 25.52       | 24.06       | 14   | 44.87   | 27.36 | 0.026   |

| Adverse event                            | Definite/Possible/Probable |       |       |    |       |         | Unlikely/Unrelated |        |         |       |       |         |
|------------------------------------------|----------------------------|-------|-------|----|-------|---------|--------------------|--------|---------|-------|-------|---------|
|                                          | G1                         | G2    | G3    | G4 | G5    | Total   | G1                 | G2     | G3      | G4    | G5    | Total   |
| Alanine/aspartate transaminase elevation |                            |       | 2 (3) |    |       | 2 (3)   |                    |        | 3 (4)   |       |       | 3 (4)   |
| Abdominal pain                           |                            |       |       |    |       |         | 4 (6)              | 2 (3)  | 3 (4)   |       |       | 10 (14) |
| Abdominal distension                     |                            |       |       |    |       |         | 1 (1)              |        |         |       |       | 1 (1)   |
| Acidosis                                 |                            |       |       |    |       |         |                    |        | 1 (1)   |       |       | 1 (1)   |
| Anorexia                                 |                            |       |       |    |       |         | 5 (7)              |        |         |       |       | 5 (7)   |
| Arthralgia                               |                            | 1 (1) |       |    |       | 1 (1)   |                    | 2 (3)  |         |       |       | 2 (3)   |
| Atrial fibrillation                      |                            |       |       |    |       |         |                    | 2 (3)  | 3 (4)   |       |       | 5 (7)   |
| Autoimmune disorder                      |                            | 1 (1) |       |    |       | 1 (1)   |                    |        | 1 (1)   |       |       | 1 (1)   |
| Elevated bilirubin                       |                            | 1 (1) |       |    |       | 1 (1)   |                    |        |         |       |       |         |
| Back pain                                |                            |       |       |    |       |         | 3 (4)              | 1 (1)  | 2 (3)   |       |       | 6 (9)   |
| Blurred vision                           |                            |       |       |    |       |         | 1 (1)              |        |         |       |       | 1 (1)   |
| Bone pain                                |                            | 2 (3) |       |    |       | 2 (3)   |                    |        |         |       |       |         |
| Cardiac arrest                           |                            |       |       |    |       |         | 1 (1)              |        |         |       |       | 1 (1)   |
| Catheter related infection               |                            |       |       |    |       |         |                    |        | 1 (1)   |       |       | 1 (1)   |
| Chest pain - cardiac                     | 1 (1)                      |       |       |    |       | 1 (1)   |                    |        | 1 (1)   |       |       | 1 (1)   |
| Chills                                   |                            |       |       |    |       |         |                    | 2 (3)  |         |       |       | 2 (3)   |
| Confusion                                | 1 (1)                      |       |       |    |       | 1 (1)   | 4 (6)              |        |         |       |       | 5 (7)   |
| Constipation                             | 15 (21)                    | 3 (4) |       |    |       | 18 (26) | 7 (10)             |        |         |       |       | 7 (10)  |
| Colitis                                  |                            |       | 1 (1) |    |       | 1 (1)   |                    |        | 2 (3)   |       |       | 2 (3)   |
| Cough                                    | 1 (1)                      | 1 (1) |       |    |       | 2 (3)   | 6 (9)              |        | 1 (1)   |       |       | 7 (11)  |
| Creatinine increased                     | 2 (3)                      | 1 (1) |       |    |       | 3 (4)   |                    |        | 3 (4)   | 1 (1) |       | 4 (6)   |
| Cytokine release syndrome                |                            | 1 (1) | 1 (1) |    |       | 2 (3)   |                    |        |         |       |       |         |
| Delirium                                 |                            |       |       |    |       |         | 2 (3)              |        |         |       |       | 2 (3)   |
| Depression                               |                            |       |       |    |       |         | 1 (1)              | 2 (3)  |         |       |       | 3 (4)   |
| Diarrhoea                                | 14 (20)                    |       |       |    |       | 14 (20) | 10 (14)            | 3 (4)  | 1 (1)   |       |       | 14 (20) |
| Dizziness                                | 1 (1)                      |       |       |    |       | 1 (1)   |                    | 1 (1)  |         |       |       | 1 (1)   |
| Dry eye                                  |                            |       |       |    |       |         | 1 (1)              |        |         |       |       | 1 (1)   |
| Dry skin                                 | 3 (4)                      |       |       |    |       | 3 (4)   | 1 (1)              |        |         |       |       | 1 (1)   |
| Dyspepsia                                |                            |       |       |    |       |         | 1 (1)              |        |         |       |       | 1 (1)   |
| Dysphagia                                | 1 (1)                      |       |       |    |       | 1 (1)   |                    |        |         |       |       |         |
| Dyspnoea                                 | 2 (3)                      |       |       |    |       | 2 (3)   |                    | 1 (1)  | 4 (6)   |       |       | 5 (7)   |
| Enema of limbs                           |                            |       |       |    |       |         | 5 (7)              | 3 (4)  | 2 (3)   |       |       | 10 (14) |
| Enterocolitis                            |                            | 1 (1) |       |    |       | 1 (1)   |                    |        |         |       |       |         |
| Epistaxis                                |                            |       |       |    |       |         |                    | 1 (1)  | 1 (1)   |       |       | 2 (3)   |
| Erectile dysfunction                     |                            |       |       |    |       |         | 1 (1)              |        |         |       |       | 1 (1)   |
| Erythema multiforme                      |                            |       | 1 (1) |    |       | 1 (1)   | 1 (1)              |        |         |       |       | 1 (1)   |
| Eye disorders                            |                            |       | 1 (1) |    |       | 1 (1)   |                    |        |         |       |       |         |
| Falls                                    |                            |       |       |    |       |         | 2 (3)              | 2 (3)  | 2 (3)   |       |       | 6 (9)   |
| Fatigue                                  |                            | 1 (1) | 1 (1) |    |       | 2 (3)   | 1 (1)              | 1 (1)  |         |       |       | 2 (3)   |
| Febrile neutropenia                      |                            |       | 4 (6) |    |       | 4 (6)   |                    |        | 38 (54) |       |       | 38 (54) |
| Fever                                    |                            |       |       |    |       |         | 2 (3)              | 3 (4)  | 8 (11)  |       |       | 13 (18) |
| Gastrointestinal disorders               |                            | 1 (1) |       |    |       | 1 (1)   | 3 (4)              | 3 (4)  | 2 (3)   |       |       | 8 (11)  |
| Generalized muscle weakness              |                            | 2 (3) |       |    |       | 2 (3)   |                    |        | 1 (1)   |       |       | 1 (1)   |
| Gingival pain                            |                            |       |       |    |       |         | 1 (1)              |        |         |       |       | 1 (1)   |
| Headache                                 |                            |       |       |    |       |         | 4 (6)              |        |         |       |       | 4 (6)   |
| Heart failure                            |                            |       |       |    |       |         |                    |        |         |       | 1 (1) | 1 (1)   |
| Haematuria                               |                            |       |       |    |       |         | 1 (1)              |        | 1 (1)   |       |       | 2 (3)   |
| Hepatic failure                          |                            |       |       |    |       |         |                    |        |         | 1 (1) |       | 1 (1)   |
| Hypo/Hypercalcemia                       |                            |       |       |    |       |         |                    |        | 1 (1)   |       |       | 1 (1)   |
| Hypo/Hyperkalaemia                       |                            |       |       |    |       |         |                    |        | 10 (14) |       |       | 10 (14) |
| Hyponatremia                             |                            |       |       |    |       |         |                    |        | 9 (12)  |       |       | 9 (12)  |
| Hyperglycaemia                           |                            |       |       |    |       |         |                    |        | 4 (6)   | 2 (3) |       | 6 (9)   |
| Hypophosphatemia                         |                            |       |       |    |       |         |                    |        | 3 (4)   |       |       | 3 (4)   |
| Hypotension                              |                            |       |       |    |       |         | 1 (1)              | 1 (1)  | 7 (10)  | 2 (3) |       | 11 (16) |
| Hypoxia                                  |                            |       |       |    |       |         |                    | 1 (1)  | 2 (3)   |       |       | 3 (4)   |
| Ileus                                    |                            |       |       |    |       |         |                    | 2 (3)  |         |       |       | 2 (3)   |
| Immune system disorders                  |                            | 1 (1) |       |    |       | 1 (1)   |                    |        |         |       |       |         |
| Infections and infestations              |                            |       |       |    |       |         | 3 (4)              | 7 (11) | 13 (18) |       | 1 (1) | 24 (34) |
| Insomnia                                 | 1 (1)                      |       |       |    |       | 1 (1)   |                    | 1 (1)  |         |       |       | 1 (1)   |
| Intracranial haemorrhage                 |                            |       |       |    |       |         |                    |        |         | 1 (1) |       | 1 (1)   |
| Laryngeal haemorrhage                    |                            |       |       |    |       |         | 2 (3)              |        | 1 (1)   |       |       | 3 (4)   |
| Lower GI haemorrhage                     |                            |       |       |    |       |         |                    |        | 2 (3)   |       |       | 2 (3)   |
| Lung infection                           |                            |       | 5 (7) |    | 2 (3) | 7 (11)  |                    |        | 31 (44) | 1 (1) | 3 (4) | 35 (50) |
| Mucositis oral                           | 1 (1)                      |       |       |    |       | 1 (1)   | 1 (1)              |        |         |       |       | 1 (1)   |
| Multiorgan failure                       |                            |       |       |    |       |         |                    |        |         | 1 (1) | 3 (4) | 4 (5)   |
| Musculoskeletal & connective tissue      |                            |       |       |    |       |         | 1 (1)              | 2 (3)  | 1 (1)   |       |       | 4 (5)   |
| Myalgia                                  |                            |       |       |    |       |         | 2 (3)              |        |         |       |       | 2 (3)   |
| Myocardial infarction                    |                            |       |       |    |       |         |                    |        | 1 (1)   |       |       | 1 (1)   |
| Myositis                                 |                            | 1 (1) |       |    |       | 1 (1)   |                    |        |         |       |       |         |
| Nasal congestion                         |                            |       |       |    |       |         | 1 (1)              | 2 (3)  |         |       |       | 3 (4)   |

|                                                 |                |                |                |              |              |            |                  |                |                  |                |                |            |
|-------------------------------------------------|----------------|----------------|----------------|--------------|--------------|------------|------------------|----------------|------------------|----------------|----------------|------------|
| Nausea                                          | 8 (11)         |                |                |              |              | 8 (11)     | 9 (13)           | 1 (1)          |                  |                |                | 10 (14)    |
| Neck pain                                       |                |                |                |              |              |            | 3 (4)            |                |                  |                |                | 3 (4)      |
| Non-cardiac chest pain                          |                |                |                |              |              |            | 3 (4)            |                |                  |                |                | 3 (4)      |
| Pain                                            |                |                |                |              |              |            | 3 (4)            | 2 (3)          | 7 (10)           |                |                | 12 (17)    |
| Pancreatitis                                    |                |                |                |              |              |            |                  | 1 (1)          |                  |                |                | 1 (1)      |
| Pharyngitis                                     |                |                |                |              |              |            |                  | 1 (1)          |                  |                |                | 1 (1)      |
| Pleural effusion                                |                |                |                |              |              |            |                  | 1 (1)          |                  |                |                | 1 (1)      |
| Pneumonitis                                     |                | 8 (11)         | 1 (1)          |              |              | 9 (13)     |                  |                |                  |                |                |            |
| Pruritus                                        |                |                | 2 (3)          |              |              | 2 (3)      |                  |                |                  |                |                |            |
| Rash, acneiform                                 | 1 (1)          |                |                |              |              | 1 (1)      |                  |                |                  |                |                |            |
| Rash, maculo-papular                            | 1 (1)          | 4 (6)          |                |              |              | 5 (8)      | 1 (1)            |                |                  |                |                | 1 (1)      |
| Renal and urinary disorders                     |                |                |                |              |              |            | 2 (3)            |                |                  |                |                | 2 (3)      |
| Respiratory failure                             |                |                |                |              |              |            |                  |                |                  | 3 (4)          | 4 (6)          | 7 (11)     |
| Respiratory, thoracic and mediastinal disorders |                |                |                |              |              |            |                  | 3 (4)          | 1 (1)            |                |                | 4 (6)      |
| Sepsis                                          |                |                |                |              |              |            |                  |                |                  | 3 (4)          | 8 (12)         | 11 (16)    |
| Skin and subcutaneous tissue disorders          | 2 (3)          | 1 (1)          | 1 (1)          |              |              | 4 (6)      | 7 (10)           | 4 (6)          |                  |                |                | 11 (16)    |
| Sinus bradycardia                               | 4 (6)          | 1 (1)          |                |              |              | 5 (8)      |                  |                |                  |                |                |            |
| Sinus tachycardia                               |                |                |                |              |              |            | 5 (8)            | 2 (3)          | 2 (3)            |                |                | 9 (13)     |
| Sinusitis                                       |                |                |                |              |              |            |                  |                | 2 (3)            |                |                | 2 (3)      |
| Skin infection                                  |                |                |                |              |              |            |                  |                | 9 (13)           |                |                | 9 (13)     |
| Sore throat                                     | 1 (1)          |                |                |              |              | 1 (1)      | 2 (3)            | 1 (1)          | 2 (3)            |                |                | 5 (7)      |
| Stroke                                          |                |                |                |              |              |            |                  |                |                  | 1 (1)          |                | 1 (1)      |
| Thromboembolic event                            |                |                |                |              |              |            |                  | 1 (1)          | 1 (1)            |                |                | 2 (3)      |
| Toxic epidermal necrolysis                      |                |                |                |              |              |            |                  |                |                  | 1 (1)          |                | 1 (1)      |
| Tremor                                          |                |                |                |              |              |            | 1 (1)            |                |                  |                |                | 1 (1)      |
| Tumor lysis syndrome                            |                |                |                |              |              |            |                  |                |                  | 3 (4)          |                | 3 (4)      |
| Upper respiratory tract infection               |                |                |                |              |              |            |                  |                |                  | 3 (4)          |                | 3 (4)      |
| Urinary tract infection                         |                |                |                |              |              |            |                  |                |                  | 3 (4)          |                | 3 (4)      |
| Vertigo                                         |                |                |                |              |              |            | 1 (1)            |                |                  |                |                | 1 (1)      |
| Vomiting                                        | 6 (9)          |                |                |              |              | 6 (9)      | 5 (7)            | 1 (1)          | 1 (1)            |                |                | 7 (11)     |
| Weight loss                                     |                |                |                |              |              |            | 1 (1)            | 1 (1)          |                  |                |                | 2 (3)      |
| <b>Total</b>                                    | <b>62 (89)</b> | <b>29 (41)</b> | <b>15 (21)</b> | <b>0 (0)</b> | <b>1 (1)</b> | <b>107</b> | <b>123 (176)</b> | <b>67 (94)</b> | <b>200 (290)</b> | <b>17 (24)</b> | <b>20 (29)</b> | <b>428</b> |

**Supplemental Table 5:** All adverse Events irrespective of attribution (related and un-related)

**Supplemental Table 6:** Dose levels of 5-azacitidine and nivolumab during the lead-in phase and for drug-related AE management

| <b>Dose level</b> | <b>5-azacitidine (mg/m<sup>2</sup>/day, Days 1-7)</b> | <b>Nivolumab (mg/kg, Days 1 and 14)</b>         |
|-------------------|-------------------------------------------------------|-------------------------------------------------|
| -4                | 25                                                    | 0.1                                             |
| -3                | 50                                                    | 0.1                                             |
| -2                | 50                                                    | 0.3                                             |
| -1                | 75                                                    | 1.0                                             |
| <b>0</b>          | <b>75</b>                                             | <b>3.0 (starting dose and established RP2D)</b> |



**Supplemental Table 7: Dose adjustments for non-hematologic drug-related AEs**

| Grade                                                                                                                                                                | Occurrence                               | Dose modification                                                                                                                                                                                                                                                                                                                                                                                                                                                                                                                                                  |
|----------------------------------------------------------------------------------------------------------------------------------------------------------------------|------------------------------------------|--------------------------------------------------------------------------------------------------------------------------------------------------------------------------------------------------------------------------------------------------------------------------------------------------------------------------------------------------------------------------------------------------------------------------------------------------------------------------------------------------------------------------------------------------------------------|
| 1 or 2                                                                                                                                                               | Any time                                 | No dose reduction                                                                                                                                                                                                                                                                                                                                                                                                                                                                                                                                                  |
| 3 or 4<br>(Persistent grade 2: Consider similar dose adjustments if persistent and not responding to optimal management in the opinion of PI and treating physician) | 1 <sup>st</sup> and 2 <sup>nd</sup> time | Hold nivolumab and 5-azacitidine.<br>Resume nivolumab and 5-azacitidine at prior dose if recovery to $\leq$ Grade 1 occurs within 14 days.<br>If toxicity persists for 15-28 days, hold therapy and resume nivolumab at prior dose and 5-azacitidine at prior dose if recovery to $\leq$ Grade 1 OR resume nivolumab at prior dose and 5-azacitidine at ONE dose level below current dose if recovery to Grade 2.<br>Dose re-escalation to prior dose of 5-azacitidine is permitted in accordance with the dose-escalation guidelines guidelines in section 5.3.6. |
|                                                                                                                                                                      | 3 <sup>rd</sup> and 4 <sup>th</sup> time | Hold nivolumab and 5-azacitidine.<br>Follow until toxicity $\leq$ Grade 2.<br>Resume nivolumab at prior dose and 5-azacitidine at TWO dose level below current dose.                                                                                                                                                                                                                                                                                                                                                                                               |
|                                                                                                                                                                      | 5 <sup>th</sup> time                     | permitted in<br>Take patient off the study.                                                                                                                                                                                                                                                                                                                                                                                                                                                                                                                        |

**Supplemental Table 8: Coverage by genes and codons tested for adequate amplicons**

| Gene                | Exons (codons) tested                                                                            |
|---------------------|--------------------------------------------------------------------------------------------------|
| ABL1 (NM_005157)    | 1-11 (1-1004), 11 (1079-1150)                                                                    |
| ASXL1 (NM_015338)   | 2-12 (20-1542)                                                                                   |
| BRAF (NM_004333)    | 1 (1-23), 1-18 (34-717), 18 (725-767)                                                            |
| DNMT3A (NM_022552)  | 2-23 (1-913)                                                                                     |
| EGFR (NM_005228)    | 1 (1-24), 2-20 (30-786), 20-23 (792-927), 23-26 (935-1043), 26-27 (1047-1061), 27-28 (1067-1211) |
| EZH2 (NM_004456)    | 2-5 (3-162), 6-7 (171-217), 8-20 (243-752)                                                       |
| FLT3 (NM_004119)    | 2-24 (15-994)                                                                                    |
| GATA1 (NM_002049)   | 2-5 (1-287), 6 (291-405), 6 (407-414)                                                            |
| GATA2 (NM_032638)   | 2-6 (1-481)                                                                                      |
| HRAS (NM_005343)    | 2-5 (1-190)                                                                                      |
| IDH1 (NM_005896)    | 3-10 (1-415)                                                                                     |
| IDH2 (NM_002168)    | 1 (1-14), 1-11 (26-453)                                                                          |
| IKZF2 (NM_016260)   | 2-8 (1-527)                                                                                      |
| JAK2 (NM_004972)    | 3-18 (1-806), 19-25 (812-1133)                                                                   |
| KIT (NM_000222)     | 1-6 (1-334), 6-21 (367-977)                                                                      |
| KRAS (NM_004985)    | 2-5 (1-189)                                                                                      |
| MDM2 (NM_002392)    | 1-11 (1-498)                                                                                     |
| MLL (NM_005933)     | 1-5 (103-1190), 6-36 (1207-3970)                                                                 |
| MPL (NM_005373)     | 1-9 (1-488), 10-12 (490-636)                                                                     |
| MYD88 (NM_002468)   | 1 (1-6), 1-5 (15-310)                                                                            |
| NOTCH1 (NM_017617)  | 2-31 (21-1893), 31-34 (1902-2286), 34 (2289-2552)                                                |
| NPM1 (NM_002520)    | 1-7 (1-181), 7-11 (187-295)                                                                      |
| NRAS (NM_002524)    | 2-5 (1-190)                                                                                      |
| PTPN11 (NM_002834)  | 1-4 (1-157), 5-15 (176-594)                                                                      |
| RUNX1 (NM_001754)   | 2-4 (1-70), 4-9 (73-437)                                                                         |
| TET2 (NM_001127208) | 3 (1-854), 3-11 (866-2003)                                                                       |
| TP53 (NM_000546)    | 2-11 (1-394)                                                                                     |
| WT1 (NM_024426)     | 1 (1-59, 72-105, 122-216), 2-10 (216-518)                                                        |

\*Sequencing coverage of the genes: The above table describes adequacy of coverage in our assay across the full set of covered genes, exons, and codons. Adequately covered amplicons are defined as those having total coverage depth of greater than or equal to 250 reads, or for which an orthogonal mutation analysis testing has been performed. Presence of mutations outside the tested regions listed below cannot be ruled out. Due to space limitations, only certain genes may be listed. A full list of covered genes & codons for the specific test results on this sample is available upon request.

**Supplemental Table 9A: Flow-cytometry antibody list.**

| Lymphocyte panel |                         |            | Lineage Cocktail    |                         |              |
|------------------|-------------------------|------------|---------------------|-------------------------|--------------|
| Vendor           | Antibody                | Clone      | Vendor              | Antibody                | Clone        |
| BD Biosciences   | <b>CD134/OX40</b>       | ACT35      | BD Biosciences      | CD3                     | UCHT1        |
| BD Biosciences   | <b>CD8</b>              | RPA-T8     | BD Biosciences      | CD14                    | MφP9         |
| BD Biosciences   | <b>CD3</b>              | SK7        | BD Biosciences      | CD16                    | 3G8          |
| eBioscience      | <b>CD357/GITR</b>       | eBioAITR   | BD Biosciences      | CD56                    | NCAM16.2     |
| BD Biosciences   | <b>CD13</b>             | WM15       | <b>Ligand panel</b> |                         |              |
| Biologend        | <b>CD137/4-1BB</b>      | 4B4-1      | <b>Vendor</b>       | <b>Antibody</b>         | <b>Clone</b> |
| Life Technology  | <b>Yellow Live/Dead</b> |            | eBioscience         | <b>CD275/ICOSL</b>      | MIH12        |
| Biologend        | <b>TIM-3</b>            | F38-2E2    | BD Biosciences      | <b>CD80/B7-1</b>        | L307.4       |
| BD Biosciences   | <b>CD279/PD-1</b>       | EH12.1     | BD Biosciences      | <b>HLA-DR</b>           | G46-6        |
| BD Biosciences   | <b>CD127/IL-7Ra</b>     | HIL-7R-M21 | Biologend           | <b>CD34</b>             | 561          |
| eBioscience      | <b>CD45</b>             | HI30       | Life Technology     | <b>Yellow Live/Dead</b> |              |
| eBioscience      | <b>CD223/LAG-3</b>      | 3DS223H    | BD Biosciences      | <b>CD38</b>             | HB7          |
| BD Biosciences   | <b>CD33</b>             | WM53       | BD Biosciences      | <b>CD273/PD-L2</b>      | MIH18        |
| BD Biosciences   | <b>CD34</b>             | 581        | BD Biosciences      | <b>CD86/B7-2</b>        | 2331 FUN-1   |
| eBioscience      | <b>CD4</b>              | SK3        | BD Biosciences      | <b>CD274/PD-L1</b>      | MIH1         |
| eBioscience      | <b>CD278/ICOS</b>       | ISA-3      | eBioscience         | <b>CD45</b>             | HI30         |
| BD Biosciences   | <b>CD152/CTLA-4</b>     | BNI3       | BD Biosciences      | <b>CD137L/41-BB</b>     | C65-485      |
| eBioscience      | <b>FoxP3</b>            | PCH101     | BD Biosciences      | <b>CD33</b>             | WM53         |
|                  |                         |            | BD Biosciences      | <b>CD13</b>             | WM15         |
|                  |                         |            | Biologend           | <b>Galectin-9</b>       | 9M1-3        |
|                  |                         |            | BD Biosciences      | <b>CD252/OX40L</b>      | ik-1         |

## Supplemental Table 9B: Mass Cytometry (CYTOF) antibody list

| <b>Marker</b>               | <b>Clone</b> |
|-----------------------------|--------------|
| CD45                        | HI30         |
| CD8a                        | RPA-T8       |
| TIGIT                       | MBSA43       |
| CD68                        | Y1/82A       |
| CD34                        | 581          |
| CD4                         | RPA-T4       |
| ICOSL                       | 2D3          |
| ICOS                        | ISA-3        |
| OX40                        | ACT35        |
| LAG-3                       | 874501       |
| PD-L1                       | MIH1         |
| CD3                         | UCTH1        |
| Tbet                        | 4B10         |
| TIM-3                       | F38-2E2      |
| HVEM                        | ANC3B7       |
| CD45RA                      | HI100        |
| CD86                        | IT2.2        |
| PD-1                        | EH12.2H7     |
| VISTA                       | 730804       |
| CD19                        | HIB19        |
| CCR7                        | G043H7       |
| FoxP3                       | PCH101       |
| BTLA                        | J168-540     |
| RORgt                       | AFKJS-9      |
| KI67                        | B56          |
| CD28                        | CD28.2       |
| CXCR3                       | G025H7       |
| B7-H4                       | 9M1-3        |
| <b>CD13, CD33WM15, WM53</b> |              |
| CTLA-4                      | 14D3         |
| GITR                        | 621          |
| PD-L2                       | 24F.10C12    |
| Eomes                       | WD1928       |
| CD45RO                      | UCHL1        |
| 4-1BB                       | 4B4-1        |
| CCR6                        | G034E3       |
| HLA-DR                      | L243         |

**Supplemental Table 9C: Time points of bone marrow aspirate and peripheral blood collection for immune monitoring by flow cytometry or CYTOF**

| PA13 ACC# | Pre-Therapy |      | EOC1 |      | EOC2 |      | EOC4 |      |
|-----------|-------------|------|------|------|------|------|------|------|
|           | BMA         | PBMC | BMA  | PBMC | BMA  | PBMC | BMA  | PBMC |
| 638       | x           | X    | x    |      |      |      |      |      |
| 766       | x           | X    | x    |      | x    |      | x    |      |
| 854       | x           | X    | x    | X    | x    | X    |      |      |
| 864       | x           | X    | x    | X    | x    | X    |      |      |
| 871       | x           | X    | x    | X    | x    | X    |      |      |
| 916       | x           | X    | x    | X    | x    | X    | x    |      |
| 917       | x           | X    | x    | X    | x    | X    |      |      |
| 946       | x           | X    |      |      | x    | X    |      |      |
| 1012      | x           | X    | x    | X    | x    | X    |      | X    |
| 1051      | x           | X    | x    | X    | x    | X    |      |      |
| 1063      | x           | X    | x    | X    |      |      |      |      |
| 1065      | x           | X    | x    | X    | x    | X    | x    |      |
| 1074      | x           | X    | x    | X    |      | X    | x    | X    |
| 1112      | x           | X    | x    | X    | x    | X    |      | X    |
| 1127      | x           | X    | x    | X    | x    | X    |      |      |
| 1215      | x           | X    | x    | X    | x    | X    | x    | X    |
| 1295      | x           | X    | x    | X    | x    | X    | x    | X    |
| 1310      | x           | X    | x    | X    | x    | X    |      |      |
| 1342      | x           | X    | x    | X    | x    | X    | x    | X    |
| 1387      | x           | X    | x    | X    | x    | X    | x    | X    |
| 1523      | x           | X    | x    | X    | x    |      |      | X    |
| 1539      | x           | X    | x    | X    | x    | X    |      |      |
| 1552      | x           | X    | x    | X    |      | X    |      |      |
| 1556      | x           | X    | x    | X    | x    | X    |      |      |
| 1633      | x           | X    | x    |      | x    |      |      |      |
| 1655      | x           | X    | x    | X    | x    | X    |      |      |
| 1673      | x           | X    | x    | X    | x    | X    | x    |      |
| 1721      | x           | X    | x    | X    | x    | X    |      |      |
| 1753      | x           | X    | x    | X    | x    | X    |      |      |
| 1795      | x           | X    | x    | X    | x    |      |      |      |
| 1817      | x           | X    | x    |      | x    |      |      |      |
| 1857      | x           | X    | x    | X    |      |      | x    | X    |
| 1993      | x           | X    |      | X    | x    | X    |      | X    |
| 2016      | x           | X    | x    | X    |      |      |      |      |
| 2050      | x           | X    | x    | X    | x    |      | x    | X    |
| 2148      | x           | X    | x    | X    | x    |      |      | X    |
| 2180      | x           | X    | x    | X    |      |      | x    | X    |
| 2254      | x           |      | x    |      |      |      |      |      |
| 2259      | x           | X    | x    | X    |      |      |      | X    |
| 2281      | x           | X    | x    | X    | x    |      |      |      |
| 2359      | x           | X    | x    | X    | x    | X    | x    |      |
| 2384      | x           | X    | x    | X    |      |      |      |      |

**Supplemental Figure 1: Correlation of responses (CR, CRi, PR, HI) to molecular and cytogenetic features**

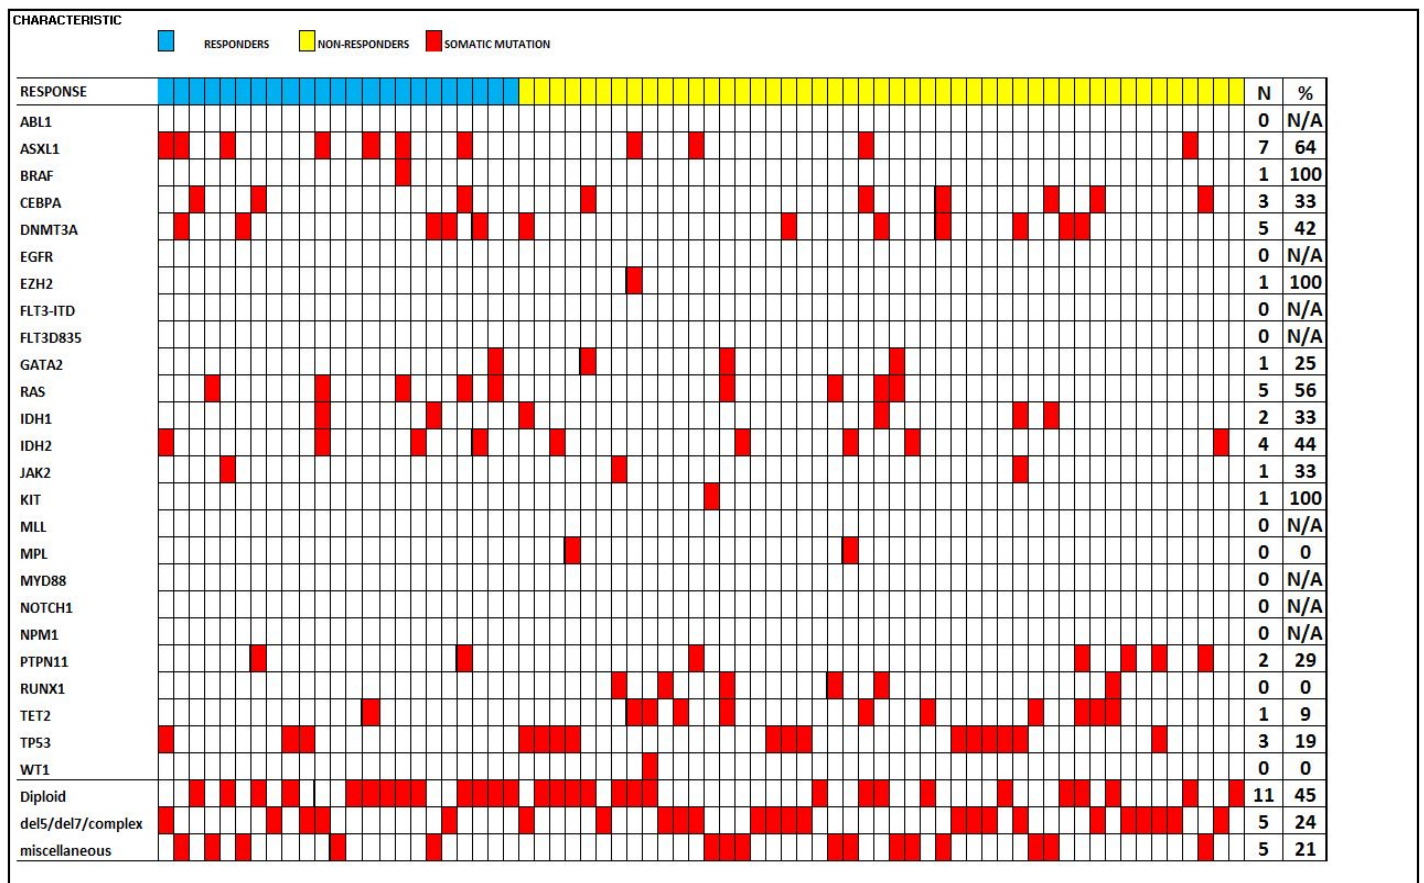

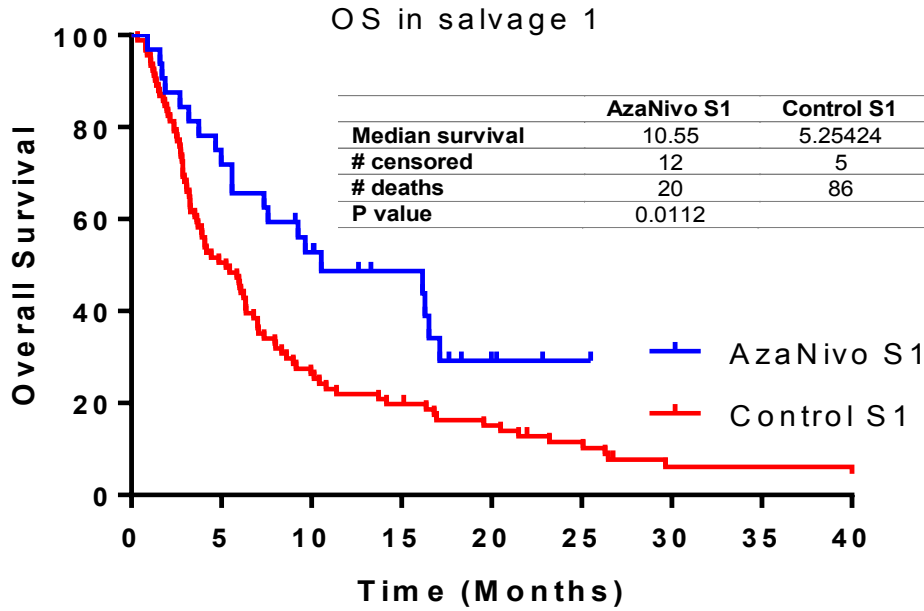

Supplemental Figure 2A: Comparison of OS in azacitidine with nivolumab versus other HMA-based clinical trials in salvage 1 setting with median OS of 10.6 and 5.25 months, respectively (p value=0.0112)

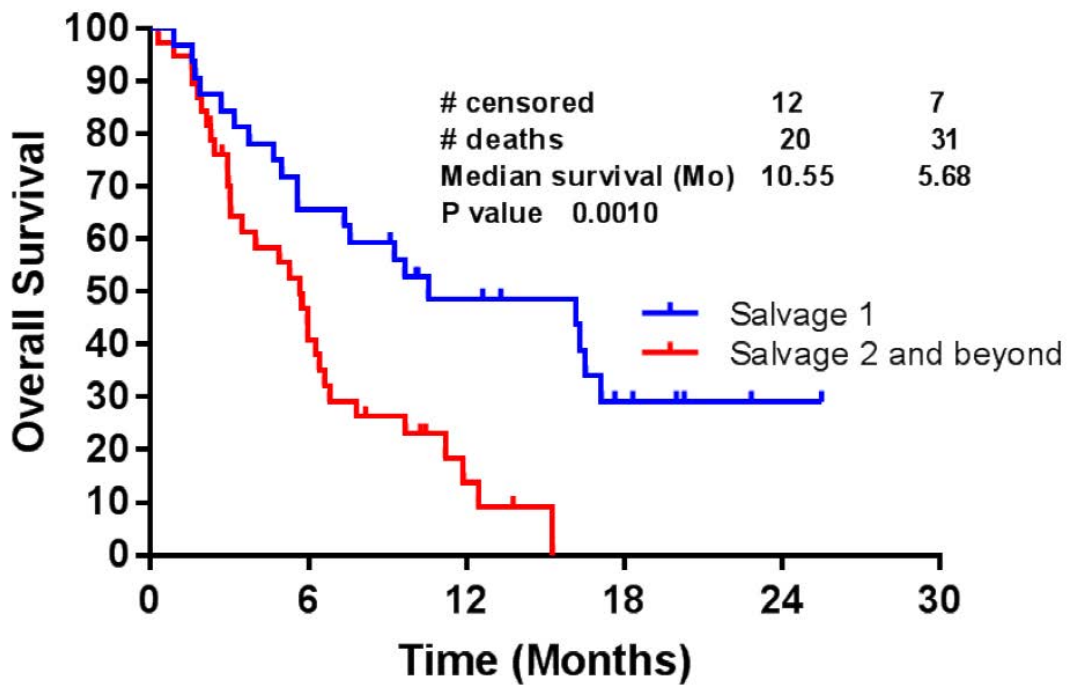

**Figure 2B.** Overall survival in patients who received azacitidine and nivolumab in first salvage (N=32) versus patients who received this in salvage 2 or beyond (N=38) (P value=0.001).

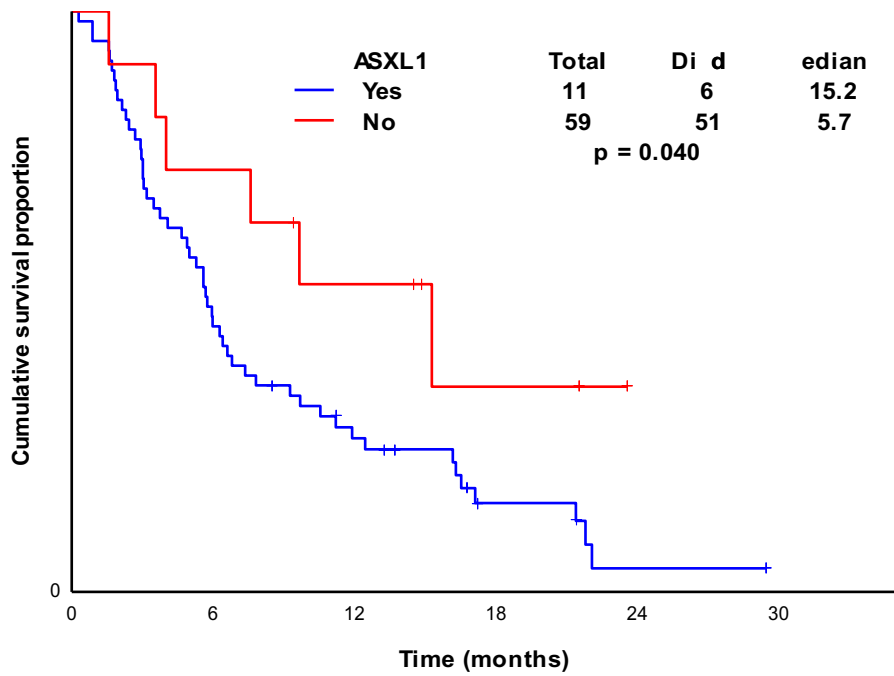

**Supplemental Figure 2C:** Overall survival with azacitidine and nivolumab in patients harboring an ASXL1 mutation versus those who do not have an ASXL1 mutation

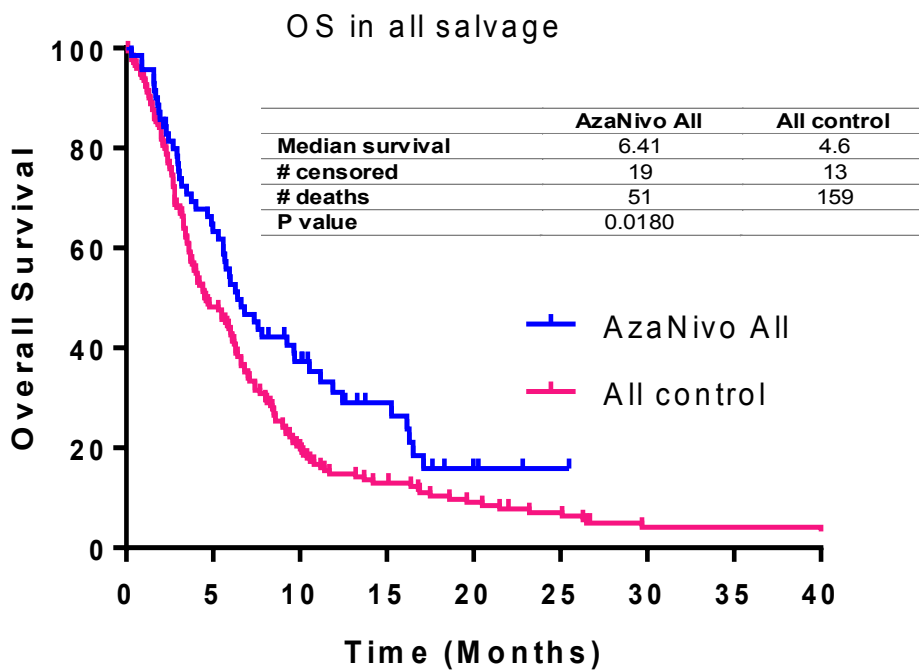

**Supplemental Figure 2D:** Comparison of OS in azacitidine with nivolumab versus other HMA-based clinical trials in all salvage setting with median OS of 6.3 and 4.6 months, respectively (p value=0.018)



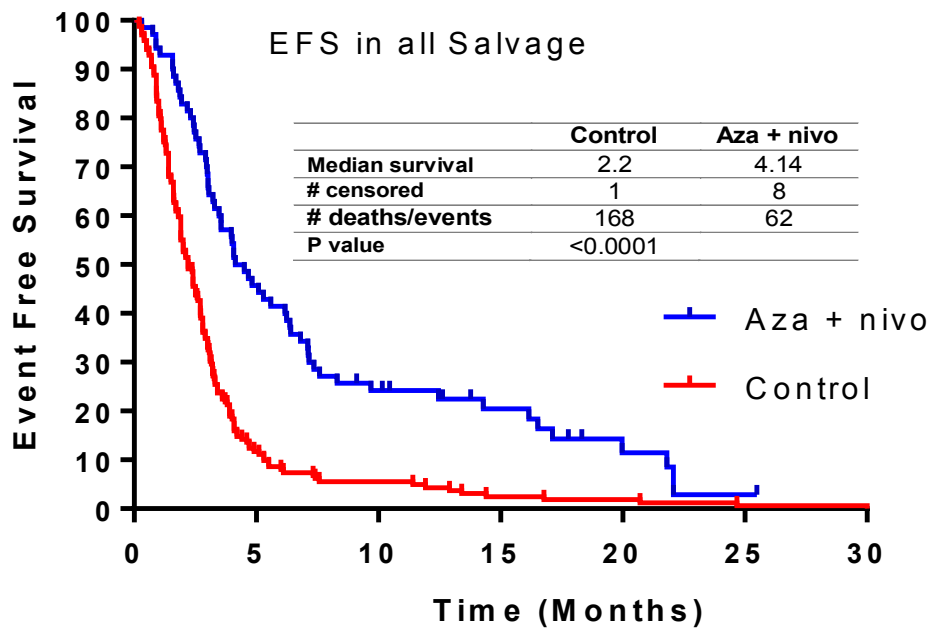

Supplemental Figure 3A: Event Free Survival with azacitidine with nivolumab versus other HMA-based clinical trials in all salvage setting. The median EFS is 4.2 vs 2.2, respectively (P value= <0.0001).

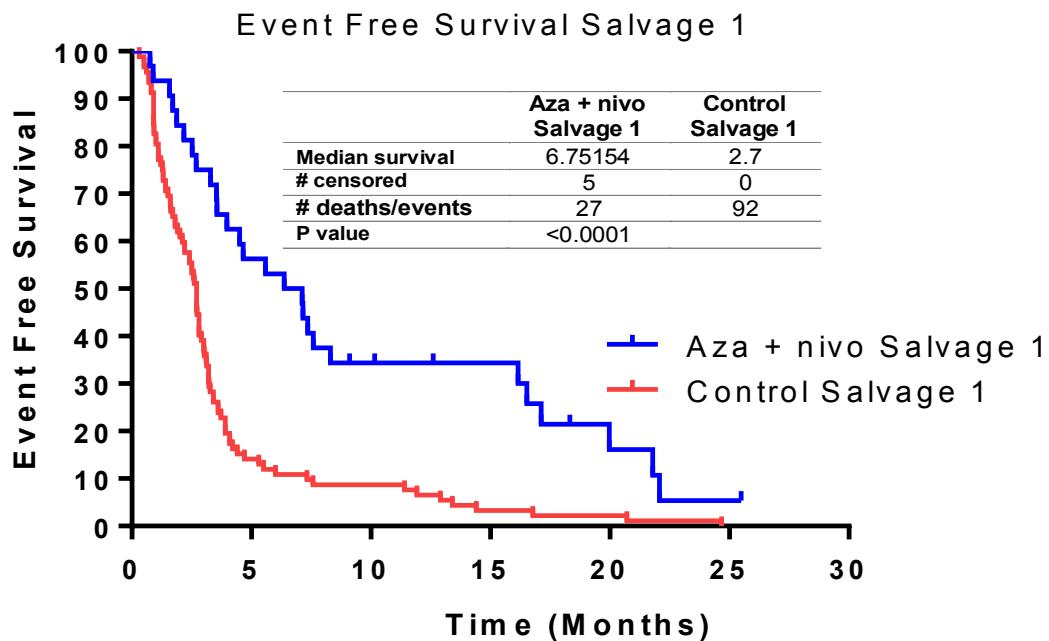

Supplemental Figure 3B: Event Free Survival with azacitidine with nivolumab versus other HMA-based clinical trials in the first salvage setting. The median EFS is 6.8 vs 2.7, respectively (P value= <0.0001)

Supplemental Figure 4

Increase in the frequency of CD4<sup>+</sup>Teff CTLA-4<sup>+</sup> and CD8<sup>+</sup>CTLA4<sup>+</sup> cells in BMAs following 4 doses of nivolumab (EOC2) was seen in patients with survival <1 year (n=30) but not in patients with survival >1 year (n=12), by 17-color flow cytometry.

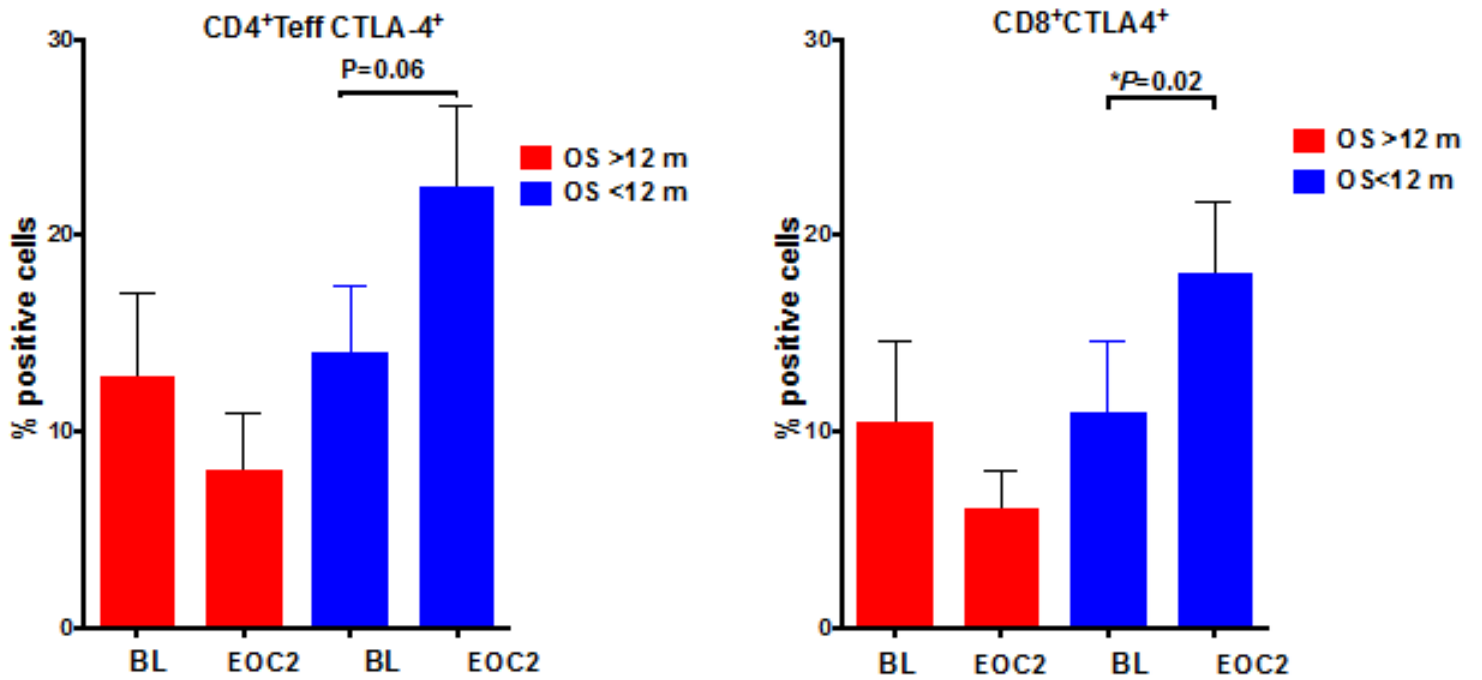

**Supplemental Figure 5A:** Representative samples of CD3 and CD8 staining by immunohistochemistry on bone marrow clots and bone marrow biopsies

**BM Clots IHC staining examples**

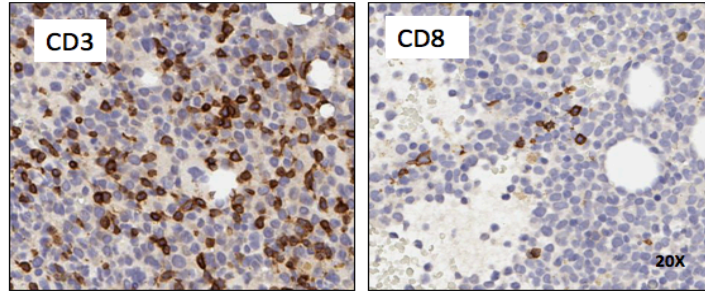

**BM biopsies IHC examples**

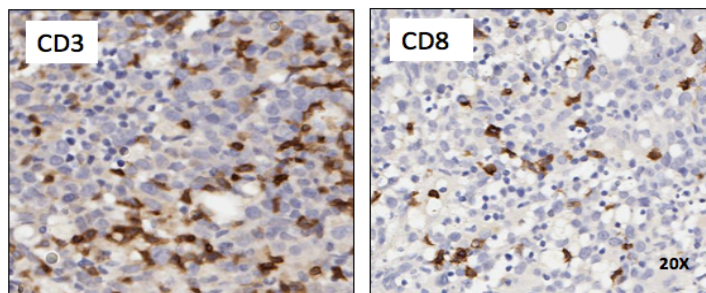

**Supplemental Figure 5B: Pretherapy bone marrow clot T cell infiltration in responders versus non-responders**

Pretherapy CD3<sup>+</sup> and CD8<sup>+</sup> cell density was higher in the bone marrow clots of patients with CR/CRi/PR versus non-responders, by immunohistochemistry.

Abbreviations; CR: CR/CRi/PR; NR: Non-responder

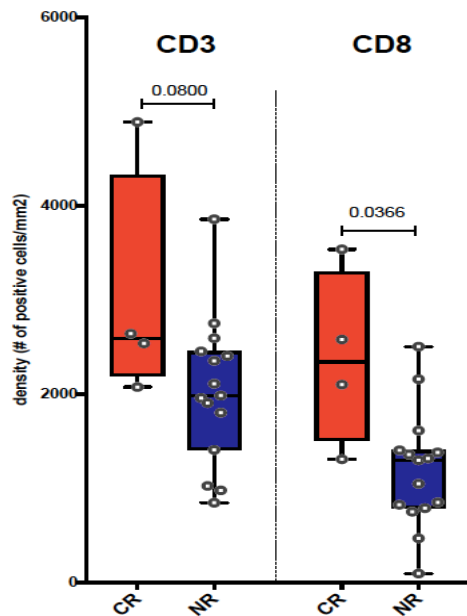

**Supplemental Figure 6A:** Flow-cytometry gating strategy for T cells from bone marrow and peripheral blood

## Gating Strategy

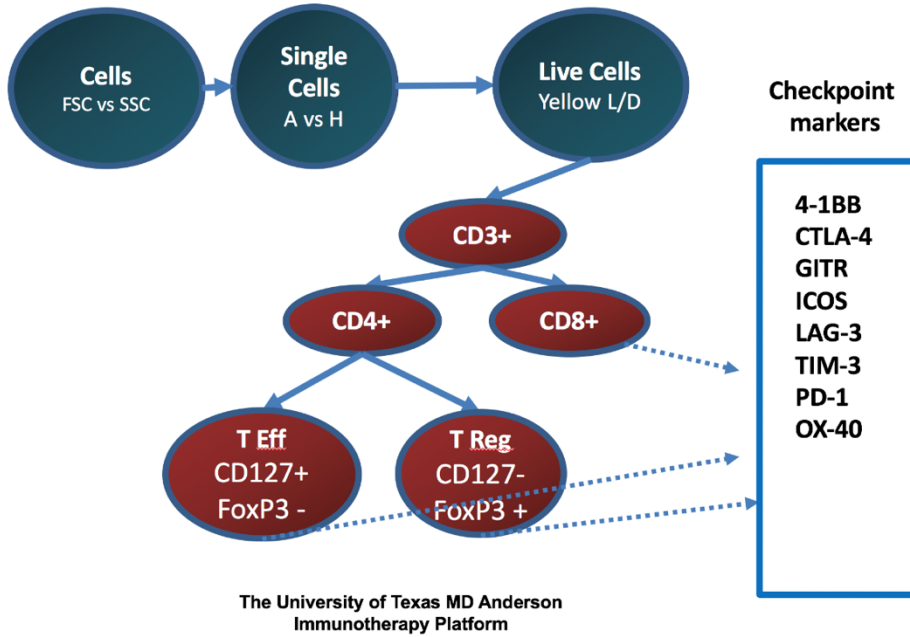

**Supplemental Figure 6B:** Flow-cytometry gating strategy for AML blasts from bone marrow and peripheral blood

## Gating Strategy

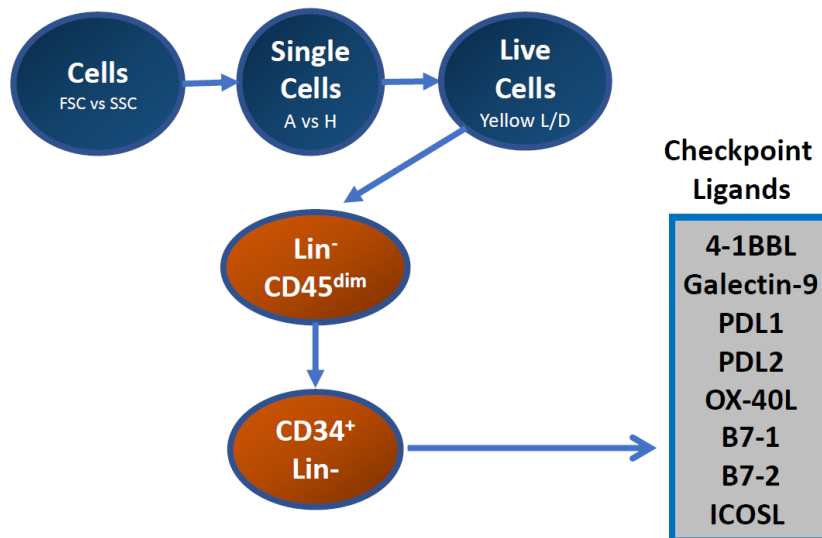

Supplement: NIHMS1512007-supplement-1.pdf [file NIHMS1512007-supplement-1.pdf]
